# Supplementary material for: Antihyperglycemic Properties of Extracts and Isolated Compounds from Australian Acacia saligna on 3T3-L1 Adipocytes
Source: MDPI journal article supplement (doi:10.3390/molecules28104054), 2023-05-12
Supplement: s1 [file s1]

## Supplementary Information

# Antihyperglycemic properties of extracts and isolated compounds from Australian *Acacia saligna* on 3T3-L1 adipocytes

Anjar P. Asmara<sup>1</sup>, Anchalee Prasansuklab<sup>2,3</sup>, Anchalee Chiabchalard<sup>2,4</sup>, Hui Chen<sup>5</sup> and Alison T. Ung<sup>1,\*</sup>

<sup>1</sup> School of Mathematical and Physical Sciences, Faculty of Science, University of Technology Sydney, Ultimo, NSW 2007, Australia

<sup>2</sup> Natural Products for Neuroprotection and Anti-Ageing Research Unit, Chulalongkorn University, Bangkok 10330, Thailand

<sup>3</sup> College of Public Health Sciences, Chulalongkorn University, Bangkok, 10330, Thailand

<sup>4</sup> Department of Clinical Chemistry, Faculty of Allied Health Sciences, Chulalongkorn University, Bangkok 10330, Thailand

<sup>5</sup> School of Life Sciences, Faculty of Science, University of Technology Sydney, Ultimo, NSW 2007, Australia

\* Correspondence: alison.ung@uts.edu.au

| Table of contents                                                                                                                                                                                                                                                                                                                                                                                                                                                            | Page  |
|------------------------------------------------------------------------------------------------------------------------------------------------------------------------------------------------------------------------------------------------------------------------------------------------------------------------------------------------------------------------------------------------------------------------------------------------------------------------------|-------|
| <b>Table S1.</b> The extraction result from dried (250g) flowers, leaves, or barks of <i>A. saligna</i> .                                                                                                                                                                                                                                                                                                                                                                    | 2     |
| <b>Table S2.</b> Viable 3T3-L1 adipocytes treated with isolates for 24, 48, and 72 h                                                                                                                                                                                                                                                                                                                                                                                         | 3     |
| <b>Table S3.</b> The estimated ROS level of adipocytes exposed to isolated compounds for 48 h                                                                                                                                                                                                                                                                                                                                                                                | 4     |
| <b>Table S4.</b> Observed data of glucose uptake simulation with the fluoroprobe 2-NBDG assay for all extracts on the 3T3-L1 adipocytes                                                                                                                                                                                                                                                                                                                                      | 4     |
| <b>Table S5.</b> Observed data of glucose uptake simulation with 2-NBDG fluorescence assay for isolated compounds on the 3T3-L1 adipocytes                                                                                                                                                                                                                                                                                                                                   | 5     |
| <b>Table S6.</b> Quantitative data of the ratio of expressed p-AMPK- $\alpha$ to AMPK- $\alpha$ (%) by adipocytes exposed to the tested MeOH extracts                                                                                                                                                                                                                                                                                                                        | 5     |
| <b>Table S7.</b> Quantitative data of the ratio of expressed p-AMPK- $\alpha$ to AMPK- $\alpha$ (%) by adipocytes exposed to the tested isolates                                                                                                                                                                                                                                                                                                                             | 6     |
| <b>Figure S1a-c.</b> Original Western blot images of membrane 1 for the immunoblot analysis (lane 1: vehicle control, 2: metformin 10 $\mu$ M, 3: FL-MeOH 12.5 $\mu$ g/mL, 4: FL-MeOH 50 $\mu$ g/mL, 5: LF-MeOH 12.5 $\mu$ g/mL, 6: LF-MeOH 50 $\mu$ g/mL, 7: BK-MeOH 12.5 $\mu$ g/mL, 8: BK-MeOH 50 $\mu$ g/mL, 9: compound 2 0.5 $\mu$ M, 10: compound 2 10 $\mu$ M, 11: isosalipurposide 3 0.5 $\mu$ M, and 12: isosalipurposide 3 10 $\mu$ M)                            | 7-9   |
| <b>Figure S2a-c.</b> Original Western blot images of membrane 2 for the immunoblot analysis (lane 1: vehicle control, 2: metformin 10 $\mu$ M, 3: quercitrin 4 0.5 $\mu$ M, 4: quercitrin 4 10 $\mu$ M, 5: myricitrin 8 0.5 $\mu$ M, 6: myricitrin 8 10 $\mu$ M, 7: metformin 10 $\mu$ M, 8: (-)-epicatechin 6 0.5 $\mu$ M, 9: (-)-epicatechin 6 10 $\mu$ M, 10: D-(+)-pinitol 5a 0.5 $\mu$ M, and 11 and 12: D-(+)-pinitol 5a 10 $\mu$ M)                                   | 10-12 |
| <b>Figure S3a-c.</b> Original Western blot images of membrane 3 for the immunoblot analysis (lane 1: vehicle control, 2: metformin 10 $\mu$ M, 3: naringenin 1 0.5 $\mu$ M, 4: naringenin 1 10 $\mu$ M, 5: quercitrin 8 0.5 $\mu$ M, 6: quercitrin 8 10 $\mu$ M, 7: (-)-pinitol 5b 0.5 $\mu$ M, 8: (-)-pinitol 5b 10 $\mu$ M, 9: (-)-epicatechin 6 0.5 $\mu$ M, 10: (-)-epicatechin 6 10 $\mu$ M, and 11: D-(+)-pinitol 5a 0.5 $\mu$ M, and 12: D-(+)-pinitol 5a 10 $\mu$ M) | 13-15 |

**Table S1.** The extraction results from dried (250g) flowers, leaves, or bark of *A. saligna*.

| Type of Extract          | ID, Mass of Extract (g)    |                            |                           |
|--------------------------|----------------------------|----------------------------|---------------------------|
|                          | Dried Flowers (FL)         | Dried Leaves (LF)          | Dried Barks (BK)          |
| Hexane (hex)             | FL-hex, 1.71               | LF-hex, 3.08               | BK-hex, 0.68              |
| Dichloromethane (DCM)    | FL-DCM, 1.79               | LF-DCM, 4.98               | BK-DCM, 2.12              |
| Methanol (MeOH)          | FL-MeOH, 26.16             | LF-MeOH, 25.37             | BK-MeOH, 18.26            |
| Water (H <sub>2</sub> O) | FL-H <sub>2</sub> O, 36.31 | LF-H <sub>2</sub> O, 13.32 | BK-H <sub>2</sub> O, 4.34 |

**Table S2.** Viable 3T3-L1 adipocytes treated with isolates for 24, 48, and 72 h.

| Sample                                              | Incubation (h) | Viable adipocytes (%) at concentrations of (μM) |               |              |                |
|-----------------------------------------------------|----------------|-------------------------------------------------|---------------|--------------|----------------|
|                                                     |                | 15.63                                           | 31.25         | 62.5         | 125            |
| Vehicle (treatment-free)                            | 24             | 100 ± 1.81                                      |               |              |                |
|                                                     | 48             | 100 ± 2.52                                      |               |              |                |
|                                                     | 72             | 100 ± 1.36                                      |               |              |                |
| Naringenin 1                                        | 24             | 98.67 ± 3.21                                    | 99.29 ± 3.58  | 97.92 ± 3.91 | 93.54 ± 1.92   |
|                                                     | 48             | 91.82 ± 8.36                                    | 98.59 ± 4.79  | 98.18 ± 4.63 | 94.33 ± 3.55   |
|                                                     | 72             | 92.65 ± 5.58                                    | 84.54 ± 6.28  | 87.11 ± 7.49 | 78.31 ± 2.28** |
| Naringenin-7O-α-L-arabinopyranose 2                 | 24             | 100.6 ± 1.39                                    | 97.51 ± 1.27  | 97.53 ± 2.69 | 96.47 ± 3.10   |
|                                                     | 48             | 96.53 ± 8.24                                    | 94.4 ± 6.88   | 91.69 ± 6.60 | 90.01 ± 10.17  |
|                                                     | 72             | 78.09 ± 4.08*                                   | 78.99 ± 5.77* | 89.79 ± 5.81 | 90.06 ± 4.65   |
| Isosalipurposide 3                                  | 24             | 93.75 ± 0.57*                                   | 96.26 ± 1.82  | 96.65 ± 2.25 | 96.92 ± 1.87   |
|                                                     | 48             | 93.21 ± 0.10                                    | 93.78 ± 2.31  | 95.64 ± 3.49 | 95.71 ± 1.44   |
|                                                     | 72             | 100.2 ± 4.14                                    | 101 ± 3.92    | 101 ± 4.02   | 101.3 ± 3.07   |
| Quercitrin 4                                        | 24             | 97.81 ± 1.83                                    | 99.16 ± 1.23  | 99.1 ± 0.98  | 98.46 ± 1.56   |
|                                                     | 48             | 95.74 ± 1.42                                    | 96.33 ± 0.94  | 98.02 ± 1.59 | 96.99 ± 2.34   |
|                                                     | 72             | 98.54 ± 1.3                                     | 98.76 ± 1.56  | 99.32 ± 1.59 | 99.92 ± 2.12   |
| D-(+)-pinitol 5a                                    | 24             | 93.58 ± 3.19                                    | 92.6 ± 2.69   | 93.65 ± 3.39 | 95.3 ± 3.63    |
|                                                     | 48             | 94.42 ± 4.16                                    | 97.64 ± 3.42  | 95.06 ± 3.84 | 95.32 ± 4.72   |
|                                                     | 72             | 97.92 ± 4.66                                    | 98.62 ± 4.07  | 98.19 ± 3.04 | 97.54 ± 3.11   |
| (-)-Pinitol 5b                                      | 24             | 91.36 ± 2.37                                    | 91.89 ± 2.19  | 91.36 ± 1.73 | 93.41 ± 2.65   |
|                                                     | 48             | 92.01 ± 3.03                                    | 93.7 ± 3.96   | 93.45 ± 3.92 | 93.35 ± 3.85   |
|                                                     | 72             | 94.38 ± 2.90                                    | 93.97 ± 4.30  | 93.58 ± 3.58 | 95.94 ± 3.92   |
| (-)-Epicatechin 6                                   | 24             | 98.17 ± 1.55                                    | 100.1 ± 0.94  | 100 ± 0.41   | 99.31 ± 0.77   |
|                                                     | 48             | 97.94 ± 3.33                                    | 97.78 ± 4.22  | 98.39 ± 4.32 | 97.73 ± 1.01   |
|                                                     | 72             | 88.74 ± 7.24                                    | 94.62 ± 2.01  | 92.28 ± 1.38 | 86.87 ± 6.90*  |
| 2,4-Di- <i>t</i> -butylphenol 7                     | 24             | 100.7 ± 1.05                                    | 98.31 ± 2.16  | 101.2 ± 1.52 | 101.5 ± 1.60   |
|                                                     | 48             | 97.8 ± 4.18                                     | 90.83 ± 1.07  | 101.4 ± 3.42 | 101.5 ± 4.69   |
|                                                     | 72             | 98.8 ± 1.35                                     | 82 ± 5.34*    | 88.6 ± 10.96 | 90.2 ± 7.58    |
| Myricitrin 8                                        | 24             | 98.77 ± 0.29                                    | 97.99 ± 3.07  | 100 ± 0.70   | 100.4 ± 1.57   |
|                                                     | 48             | 95.91 ± 2.47                                    | 94.4 ± 3.99*  | 95.05 ± 3.17 | 95.6 ± 1.52    |
|                                                     | 72             | 104.6 ± 5.07                                    | 105.4 ± 5.27  | 102.7 ± 2.84 | 104 ± 3.47     |
| 3-Hydroxy-5-(2-aminoethyl) dihydrofuran-2(3H)-one 9 | 24             | 100.2 ± 1.41                                    | 100.9 ± 1.80  | 97.23 ± 4.11 | 98.67 ± 1.84   |
|                                                     | 48             | 96.19 ± 5.80                                    | 96.76 ± 5.56  | 95.56 ± 6.77 | 96.84 ± 3.16   |
|                                                     | 72             | 82.7 ± 3.24*                                    | 95.72 ± 3.18  | 89.75 ± 6.28 | 85.22 ± 4.60*  |

\*  $p = 0.01$ ; \*\*  $p = 0.003$ ,  $p$  values were from indicated samples *vs* vehicle control ( $n = 3$ , one-way ANOVA, with Dunnett post hoc tests).

**Table S3.** The estimated ROS level of adipocytes exposed to isolated compounds for 48 h.

| Sample                                              | Cellular ROS level (%) at the corresponding concentration ( $\mu\text{M}$ ) |                    |
|-----------------------------------------------------|-----------------------------------------------------------------------------|--------------------|
|                                                     | 0.5                                                                         | 10                 |
| Vehicle                                             | 100 $\pm$ 1.87                                                              |                    |
| Naringenin 1                                        | 98.7 $\pm$ 2.89                                                             | 75.82 $\pm$ 6.20*  |
| Naringenin-7-O- $\alpha$ -L-arabinopyranoside 2     | 99.06 $\pm$ 10.95                                                           | 76.64 $\pm$ 5.16   |
| Isosalipurposide 3                                  | 98.33 $\pm$ 2.27                                                            | 80.13 $\pm$ 7.52   |
| 2,4-Di- <i>t</i> -butylphenol 7                     | 99.95 $\pm$ 0.93                                                            | 87.94 $\pm$ 5.29   |
| Quercitrin 4                                        | 102.9 $\pm$ 0.36                                                            | 87.65 $\pm$ 0.72   |
| Myricitrin 8                                        | 100.5 $\pm$ 7.66                                                            | 78.64 $\pm$ 6.14   |
| 3-Hydroxy-5-(2-aminoethyl) dihydrofuran-2(3H)-one 9 | 99.6 $\pm$ 6.24                                                             | 92.67 $\pm$ 3.20   |
| (-)-Pinitol 5b                                      | 88.76 $\pm$ 2.96                                                            | 79.57 $\pm$ 6.40   |
| (-)-Epicatechin 6                                   | 105.5 $\pm$ 3.99                                                            | 71.45 $\pm$ 4.82** |
| D-(+)-pinitol 5a                                    | 89.84 $\pm$ 0.88                                                            | 69.24 $\pm$ 3.90** |
| NAC 5 mM                                            | 78.28 $\pm$ 2.83                                                            |                    |
| NAC 10 mM                                           | 64.74 $\pm$ 2.24***                                                         |                    |
| Undifferentiated cells                              | 53.79 $\pm$ 5.41****                                                        |                    |

$p = 0.05$ , \*\*  $p = 0.002$ , \*\*\*  $p = 0.0003$ , and \*\*\*\*  $p = 0.000003$  were from the ROS level of the indicated samples *vs* vehicle control ( $n = 3$ , one-way ANOVA, with Tukey post hoc tests).

**Table S4.** Observed data of glucose uptake simulation with the fluoroprobe 2-NBDG assay for methanolic extracts on the 3T3-L1 adipocytes.

| Sample                     | 2-NBDG uptake percentage (%) |                      |
|----------------------------|------------------------------|----------------------|
|                            | 12.5 $\mu\text{g/mL}$        | 50 $\mu\text{g/mL}$  |
| Vehicle                    | 100 $\pm$ 6.54               |                      |
| FL-MeOH                    | 141.5 $\pm$ 27.94            | 185.3 $\pm$ 41.52 ** |
| LF-MeOH                    | 113.5 $\pm$ 6.1              | 198 $\pm$ 42.61 **   |
| BK-MeOH                    | 118.3 $\pm$ 9.517            | 161.6 $\pm$ 10.76    |
| Insulin 100 nM             | 140.6 $\pm$ 18.36            |                      |
| Metformin 10 $\mu\text{M}$ | 138 $\pm$ 28.26              |                      |

\*\*  $p = 0.007$  for FL-MeOH and \*\*  $p = 0.006$  for LF-MeOH compared to the vehicle control ( $n = 3$ , one-way ANOVA, with Dunnett post hoc tests).

**Table S5.** Observed data of glucose uptake simulation with 2-NBDG fluorescence assay for isolated compounds on the 3T3-L1 adipocytes.

| Sample                                              | 2-NBDG uptake percentage (%) |                    |
|-----------------------------------------------------|------------------------------|--------------------|
|                                                     | 0.5 $\mu$ M                  | 10 $\mu$ M         |
| Vehicle                                             | 100 $\pm$ 6.54               |                    |
| Naringenin 1                                        | 89.3 $\pm$ 9.47              | 127.3 $\pm$ 15     |
| Naringenin-7-O- $\alpha$ -L-arabinopyranoside 2     | 107.6 $\pm$ 7.89             | 156.4 $\pm$ 22.26  |
| Isosalipurposide 3                                  | 110.7 $\pm$ 13.26            | 161 $\pm$ 39.47    |
| Quercitrin 4                                        | 101.6 $\pm$ 14.07            | 151 $\pm$ 10.03    |
| D-(+)-pinitol 5a                                    | 108.5 $\pm$ 11.36            | 143.9 $\pm$ 12.56  |
| (-)-Pinitol 5b                                      | 96.99 $\pm$ 3.25             | 125.6 $\pm$ 13.27  |
| (-)-Epicatechin 6                                   | 108.3 $\pm$ 1.12             | 187.9 $\pm$ 41.95* |
| 2,4-Di- <i>t</i> -butylphenol 7                     | 86.39 $\pm$ 10.81            | 131.2 $\pm$ 21.57  |
| Myricitrin 8                                        | 122.7 $\pm$ 10.74            | 152.3 $\pm$ 24.02  |
| 3-Hydroxy-5-(2-aminoethyl) dihydrofuran-2(3H)-one 9 | 89.56 $\pm$ 7.20             | 96.64 $\pm$ 10.97  |
| Insulin 100 nM                                      | 140.6 $\pm$ 18.36            |                    |
| Metformin 10 $\mu$ M                                | 138 $\pm$ 28.26              |                    |

\* $p = 0.01$ ,  $p$  value was from the indicated sample against the vehicle control ( $n = 3$ , one-way ANOVA, with Dunnett post hoc tests).

**Table S6.** Quantitative data of the ratio of expressed p-AMPK- $\alpha$  to AMPK- $\alpha$  (%) by adipocytes exposed to methanolic extracts.

| Treatment                | Concentration   | Ratio of p-AMPK- $\alpha$ to AMPK- $\alpha$ (%) |
|--------------------------|-----------------|-------------------------------------------------|
| Vehicle (treatment-free) | -               | 100 $\pm$ 17.16                                 |
| Metformin                | 10 $\mu$ M      | 166.4 $\pm$ 14.08                               |
| FL-MeOH                  | 12.5 $\mu$ g/mL | 128.1 $\pm$ 10.56                               |
|                          | 50 $\mu$ g/mL   | 177 $\pm$ 16.98*                                |
| LF-MeOH                  | 12.5 $\mu$ g/mL | 128.9 $\pm$ 12.97                               |
|                          | 50 $\mu$ g/mL   | 158.5 $\pm$ 13.76                               |
| BK-MeOH                  | 12.5 $\mu$ g/mL | 129.7 $\pm$ 22.79                               |
|                          | 50 $\mu$ g/mL   | 149.1 $\pm$ 25.85                               |

\*  $p = 0.02$ ,  $p$  value was of the sample against the vehicle control ( $n = 3$ , one-way ANOVA, with Tukey post hoc tests).

**Table S7.** Quantitative data of the ratio of expressed p-AMPK- $\alpha$  to AMPK- $\alpha$  (%) by adipocytes exposed to isolated compounds.

| Sample                                          | Concentration ( $\mu$ M) | Ratio of p-AMPK- $\alpha$ to AMPK- $\alpha$ (%) |
|-------------------------------------------------|--------------------------|-------------------------------------------------|
| Vehicle                                         | -                        | 100 $\pm$ 13.36                                 |
| Metformin                                       | 10                       | 191.8 $\pm$ 21.86**                             |
| Naringenin 1                                    | 0.5                      | 123.8 $\pm$ 2.34                                |
|                                                 | 10                       | 148.4 $\pm$ 13.56                               |
| Naringenin-7-O- $\alpha$ -L-arabinopyranoside 2 | 0.5                      | 139.1 $\pm$ 13.04                               |
|                                                 | 10                       | 211.8 $\pm$ 30.27***                            |
| Isosalipurposide 3                              | 0.5                      | 129.8 $\pm$ 14.7                                |
|                                                 | 10                       | 196.6 $\pm$ 20.33**                             |
| Quercitrin 4                                    | 0.5                      | 110.7 $\pm$ 11.33                               |
|                                                 | 10                       | 148.6 $\pm$ 12.2                                |
| D-(+)-pinitol 5a                                | 0.5                      | 91.72 $\pm$ 6.07                                |
|                                                 | 10                       | 98.61 $\pm$ 8.55                                |
| (-)-Pinitol 5b                                  | 0.5                      | 94.05 $\pm$ 7.39                                |
|                                                 | 10                       | 102.7 $\pm$ 22.67                               |
| (-)-Epicatechin 6                               | 0.5                      | 99.62 $\pm$ 3.88                                |
|                                                 | 10                       | 143.2 $\pm$ 17.25                               |
| Myricitrin 8                                    | 0.5                      | 109.4 $\pm$ 10.11                               |
|                                                 | 10                       | 156 $\pm$ 8.11                                  |

\*\*  $p = 0.003$ , \*\*\*  $p = 0.0002$ ,  $p$  values were of samples against the vehicle control ( $n = 3$ , one-way ANOVA, with Tukey post hoc tests).

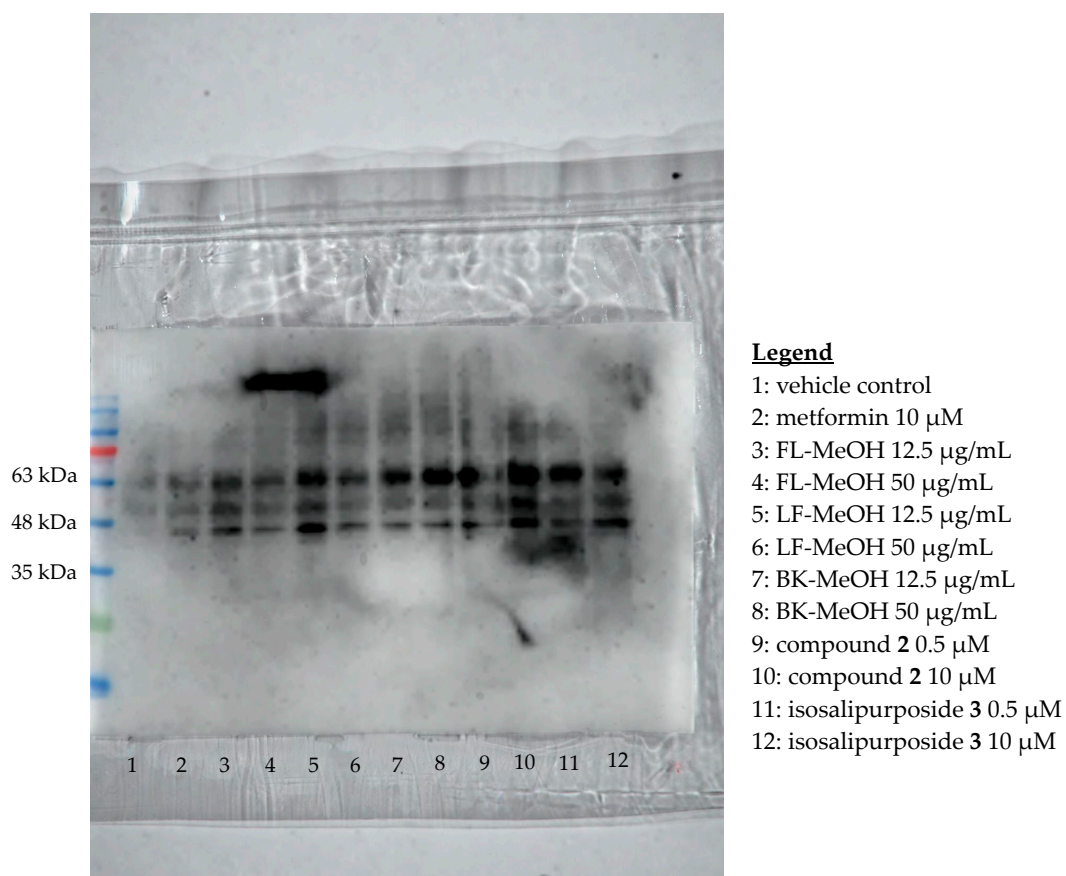

**(a) p-AMPK- $\alpha$**

**Figure S1a.** Original Western blot images of membrane 1 for the immunoblot analysis of p-AMPK.

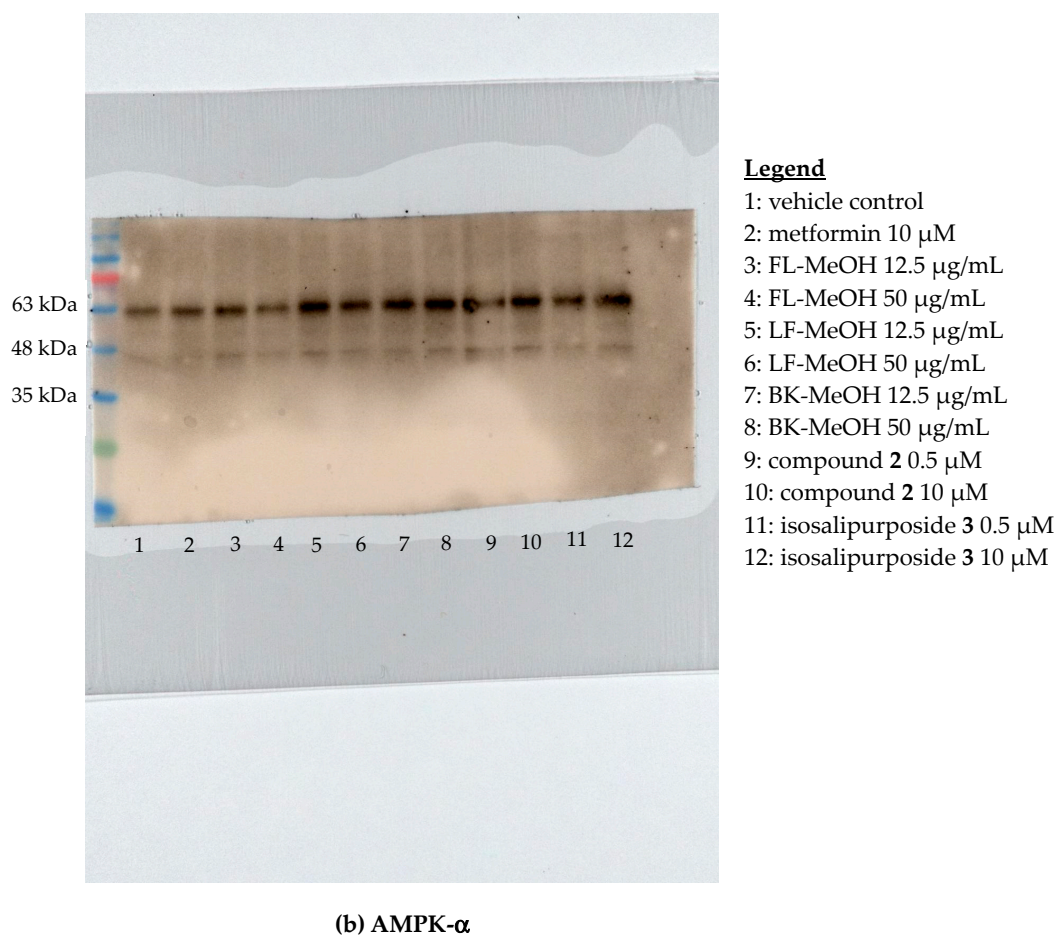

**Figure S1b.** Original Western blot images of membrane 1 for the immunoblot analysis of AMPK.



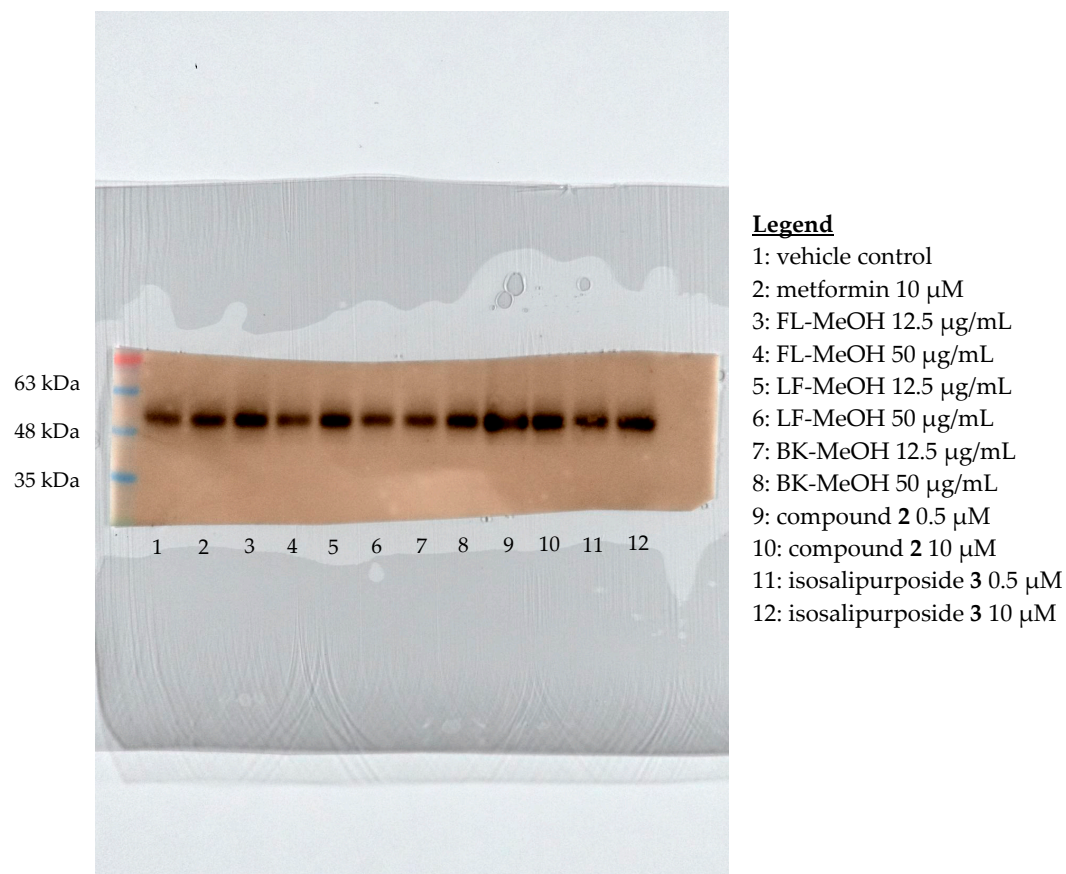

(c)  $\alpha$ -tubulin

**Figure S1c.** Original Western blot images of membrane 1 for the immunoblot analysis of  $\alpha$ -tubulin

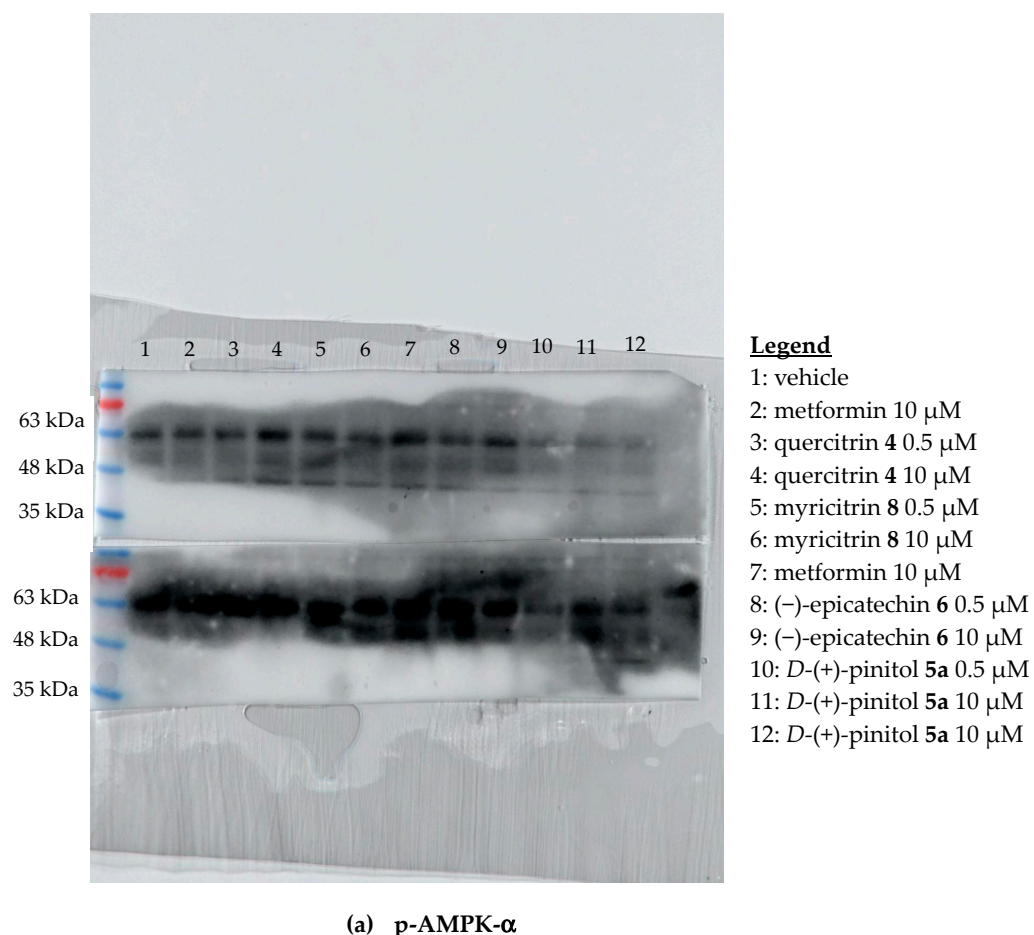

**Figure S2a.** Original Western blot images of membrane 2 for the immunoblot analysis of p-AMPK

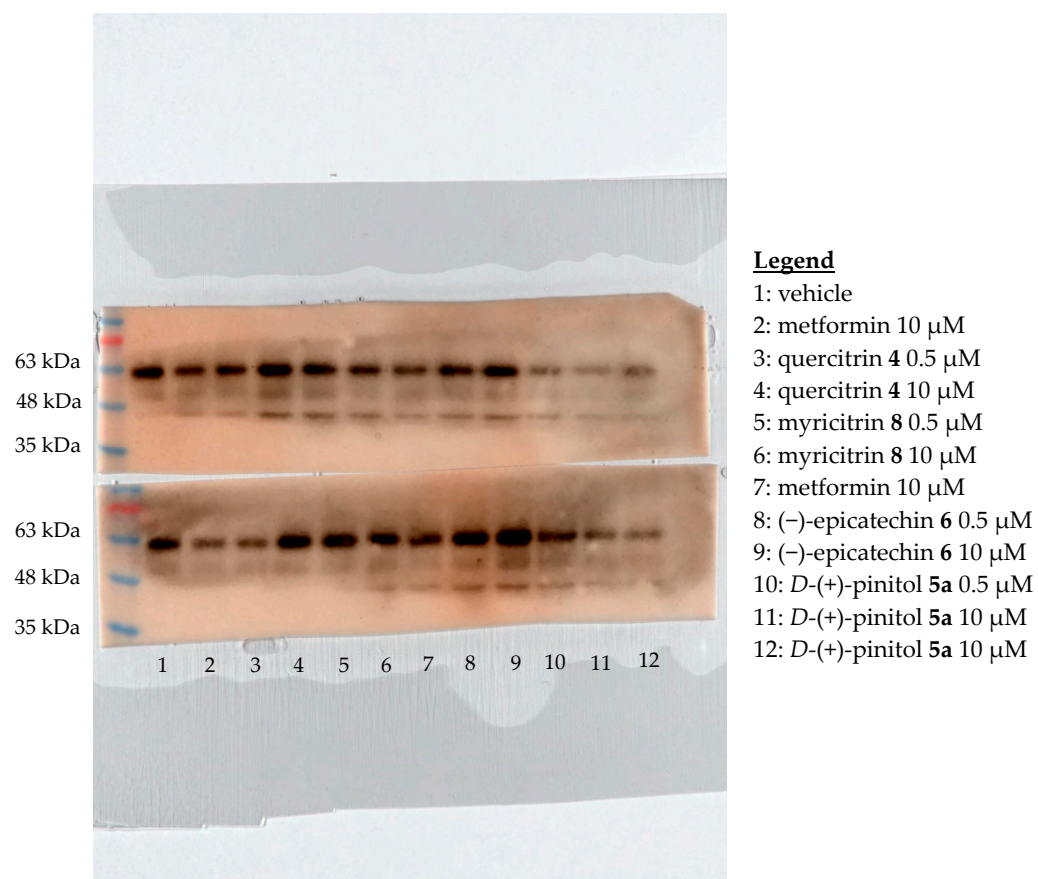

**(b) AMPK- $\alpha$**

**Figure S2b.** Original Western blot images of membrane 2 for the immunoblot analysis of AMPK

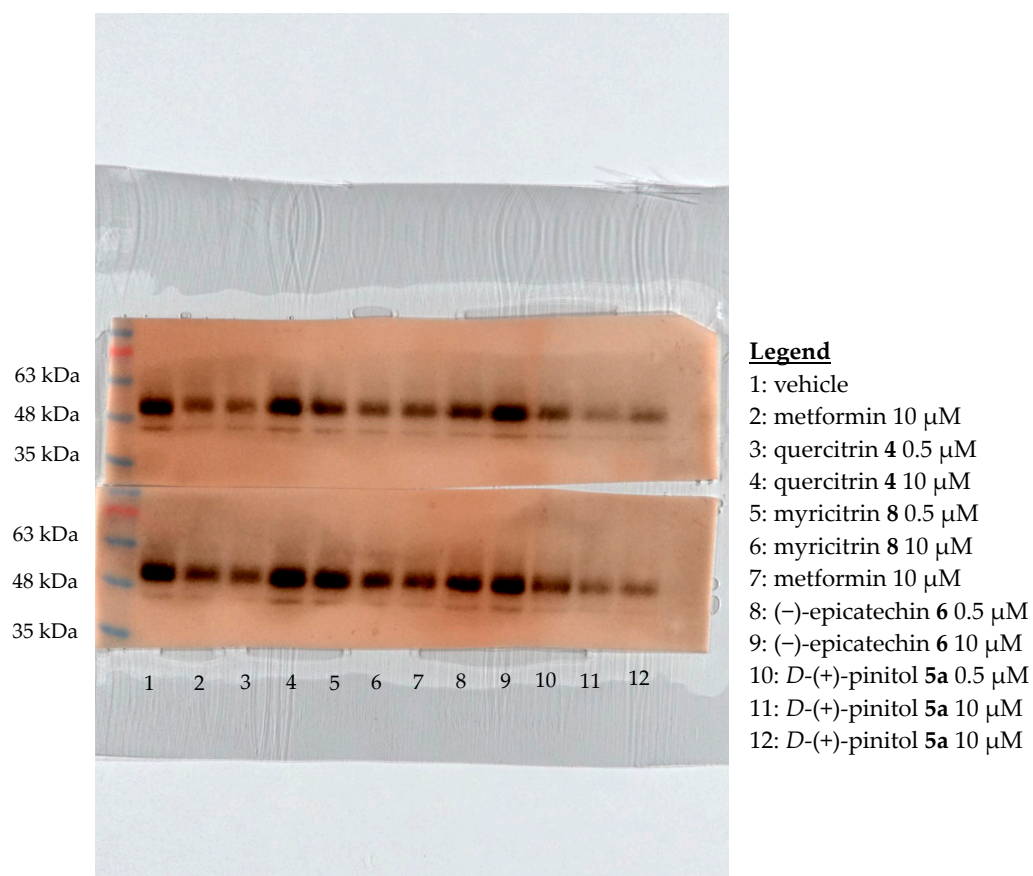

(c)  $\alpha$ -tubulin

**Figure S2c.** Original Western blot images of membrane 2 for the immunoblot analysis of  $\alpha$ -tubulin

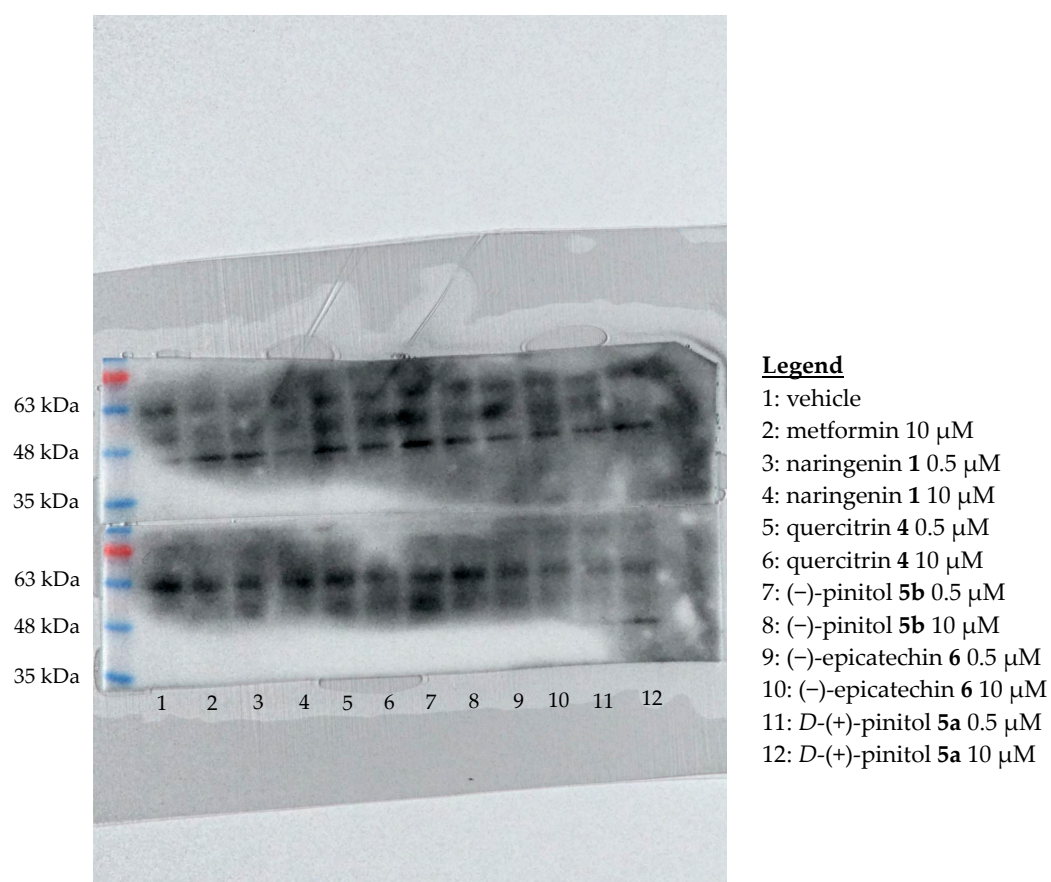

(a) p-AMPK- $\alpha$

**Figure S3a.** Original Western blot images of membrane 3 for the immunoblot analysis of p-AMPK



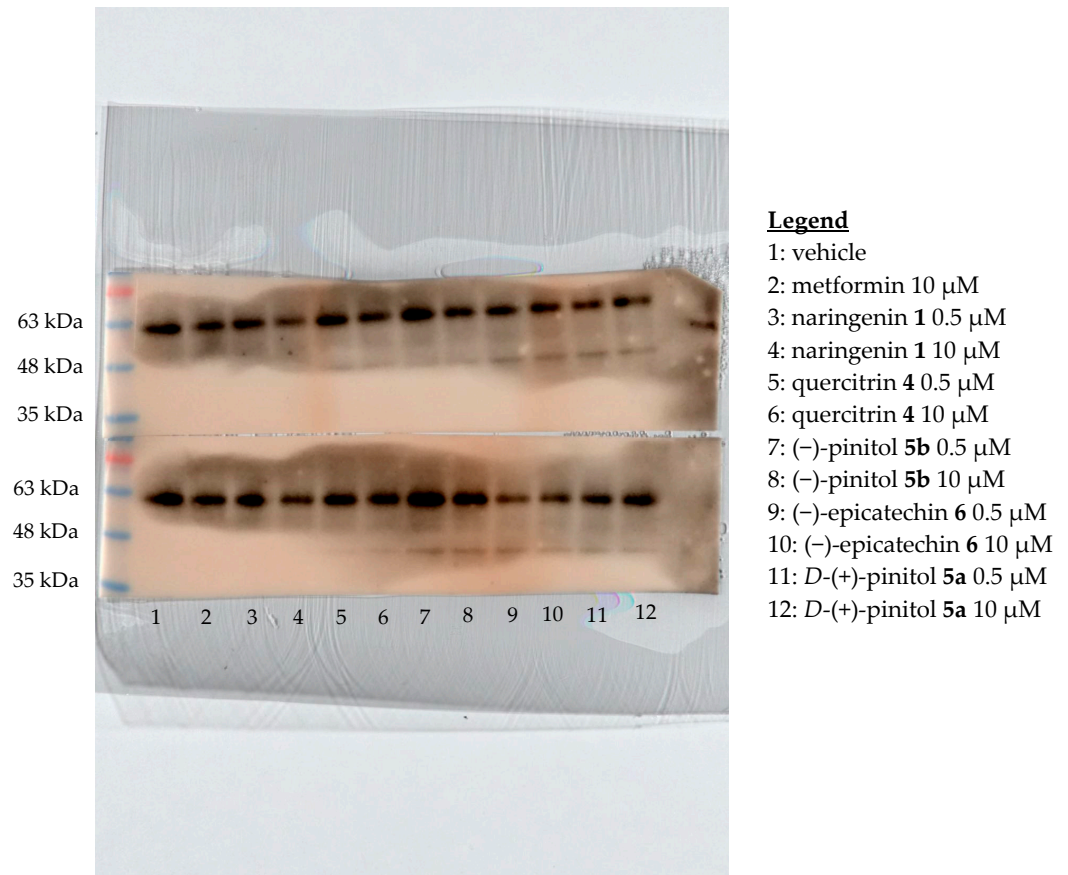

**(b) AMPK- $\alpha$**

**Figure S3b.** Original Western blot images of membrane 3 for the immunoblot analysis of AMPK

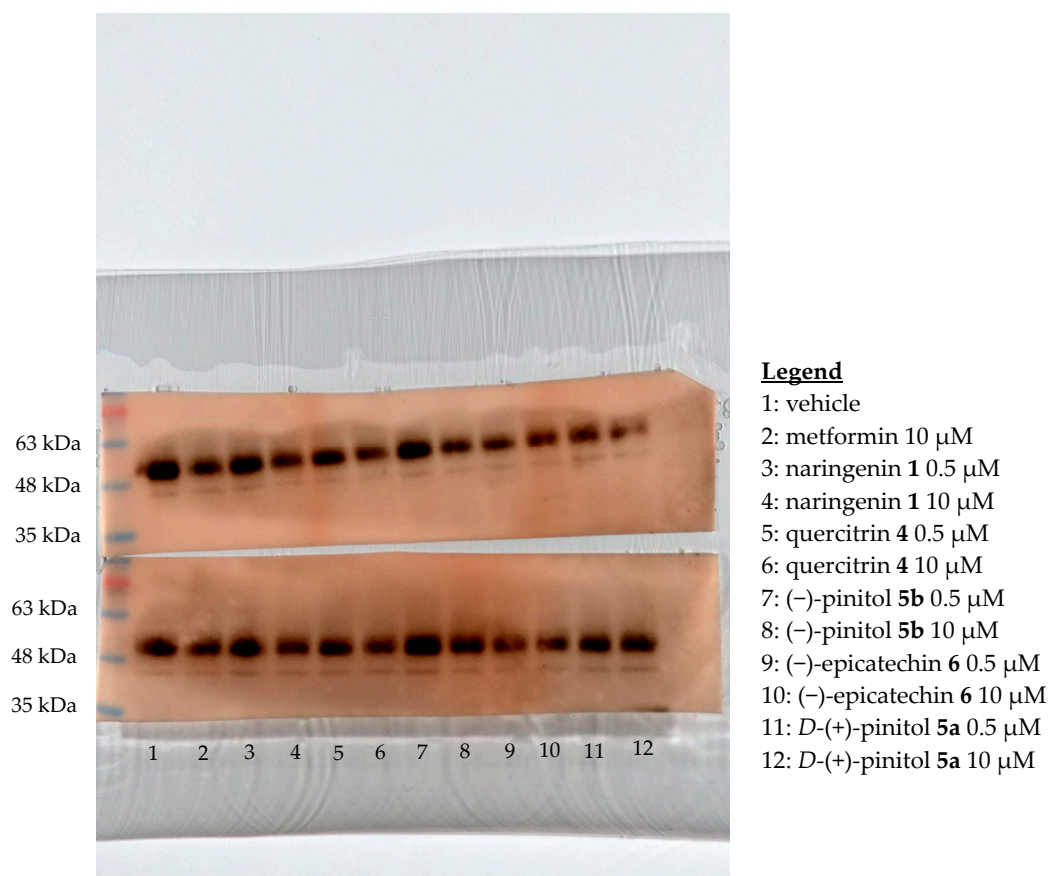

(c)  $\alpha$ -tubulin

**Figure S3c.** Original Western blot images of membrane 3 for the immunoblot analysis of  $\alpha$ -tubulin
